# Supplementary material for: Unveiling barocaloric potential in organometallic-sandwich compounds [Cp2M][PF6] (M: Fe3+, Co3+)
Source: Royal Society of Chemistry journal article supplement (doi:10.1039/d4ta03310h), 2024-01-01
Supplement: d4ta03310h1.pdf [file d4ta03310h1.pdf]

## Unveiling barocaloric potential in organometallic-sandwich compounds $[\text{Cp}_2\text{M}][\text{PF}_6]$ (M: $\text{Fe}^{3+}$ , $\text{Co}^{3+}$ )

### Supporting Information

Javier García-Ben<sup>a</sup>, Ignacio Delgado-Ferreiro<sup>a</sup>, Richard J. C. Dixey<sup>b</sup>, Socorro Castro García<sup>a</sup>, Jorge López-Beceiro<sup>c</sup>, Ramon Artiaga<sup>c</sup>, Manuel Sánchez Andújar<sup>a</sup>, Anthony Phillips<sup>b</sup>, Juan Manuel Bermúdez García<sup>a\*</sup>, María Antonia Señaris Rodríguez<sup>a\*\*</sup>

- a. *University of A Coruña, QUIMOLMAT Group, Dpt. Chemistry, Faculty of Science and Centro Interdisciplinar de Química e Bioloxía (CICA), Zapateira, 15071 A Coruña, Spain.*
- b. *School of Physical and Chemical Sciences, Queen Mary University of London, London, E1 4NS UK.*
- c. *Universidade da Coruña, Campus Industrial de Ferrol, CITENI-Grupo Proterm, Campus de Esteiro, 15403 Ferrol, Spain.*

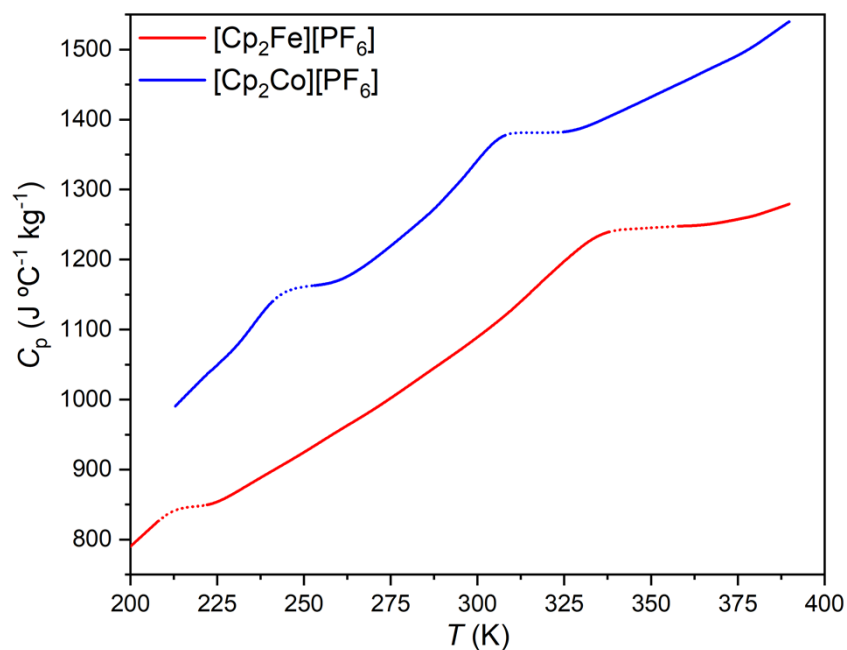

**Fig. S1.** Heat capacity as function of temperature of compound **1** (red) and compound **2** (blue) between 200 and 400 K. *Note:* the dotted region represents the  $C_p$  estimation where phase transitions occur.

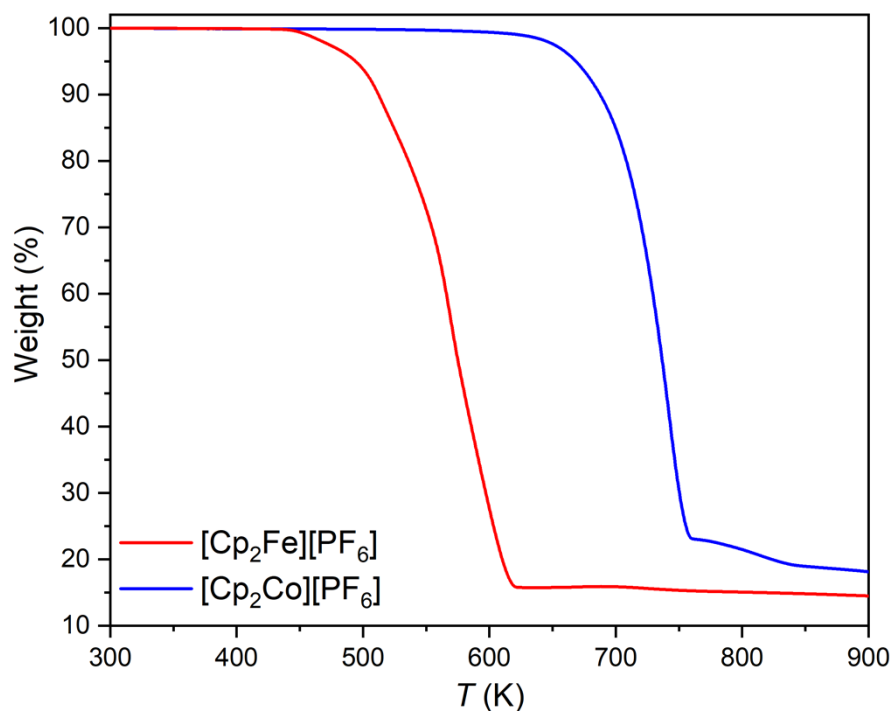

**Fig. S2.** Thermogravimetric analysis in N<sub>2</sub> atmosphere of compound **1** (red) and compound **2** (blue) between 300 and 900 K.

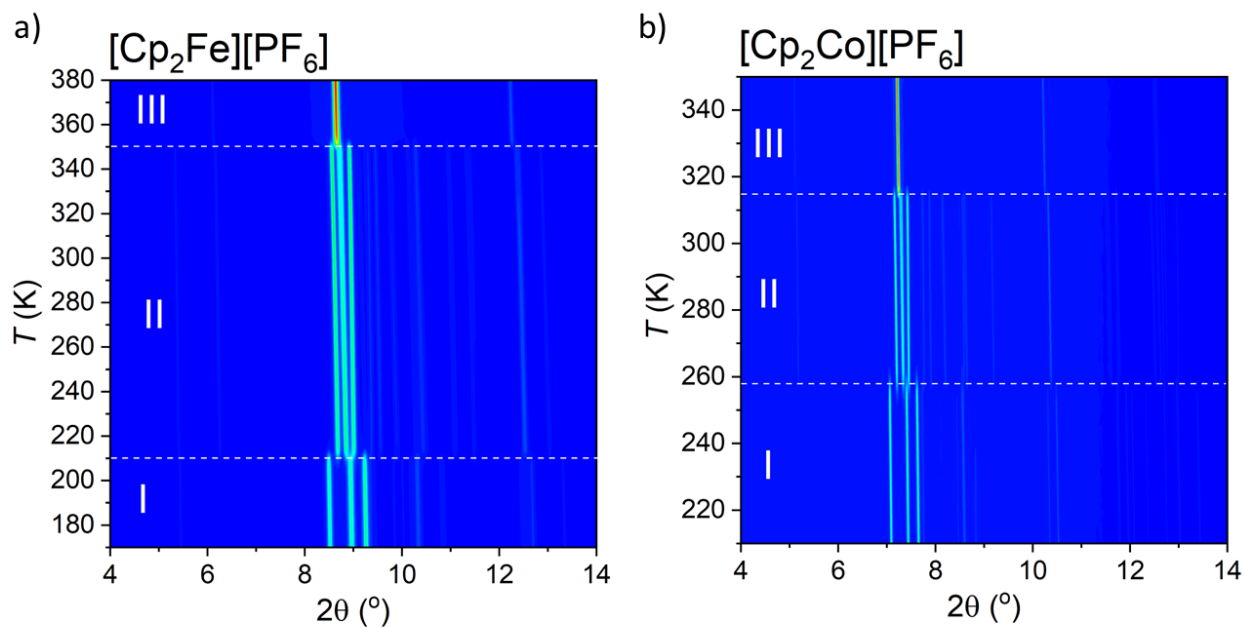

**Fig. S3.** Evolution comparison of PXRD patterns as a function of temperature of a) **1** and b) **2**.

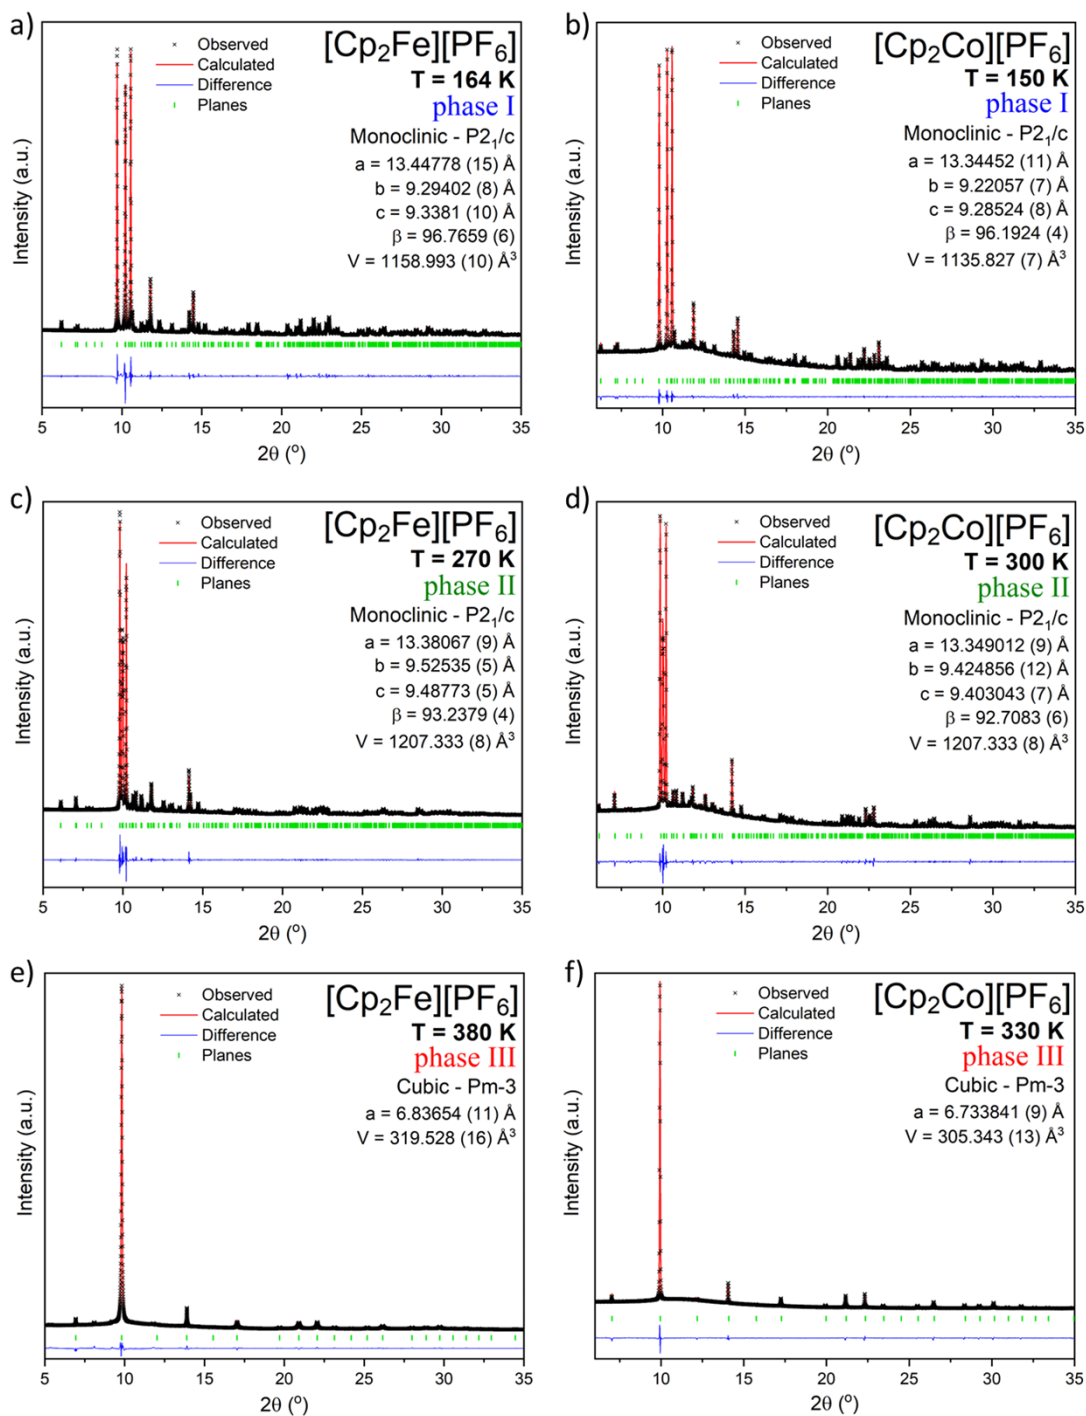

**Fig. S4.** Le Bail refinements of all the phases of both compounds, a) and b) phase I, c) and d) phase II and e) and f) phase III of compounds **1** and **2**, respectively.

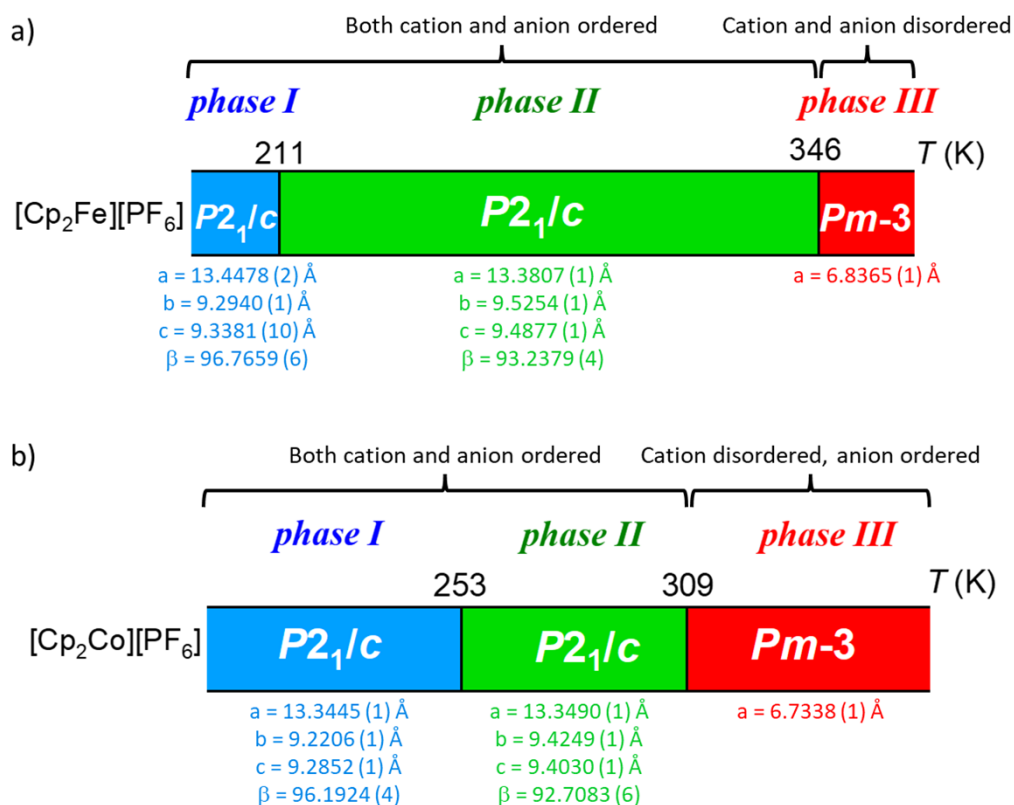

**Fig. S5.** Structure information of the three phases of a) compound **1** and b) compound **2**.

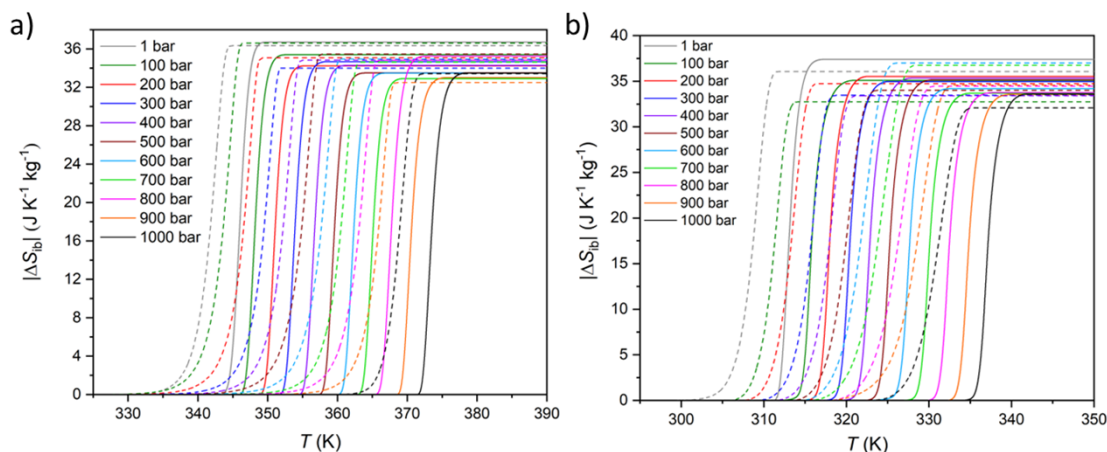

**Fig. S6.** Isobaric entropy changes of the phase transition II  $\leftrightarrow$  III for applied pressures from 1 bar to 1000 bar for a) compound **1** and b) compound **2**. *Note:* the solid lines represent the heating curves while the dashed lines represent the cooling curves.

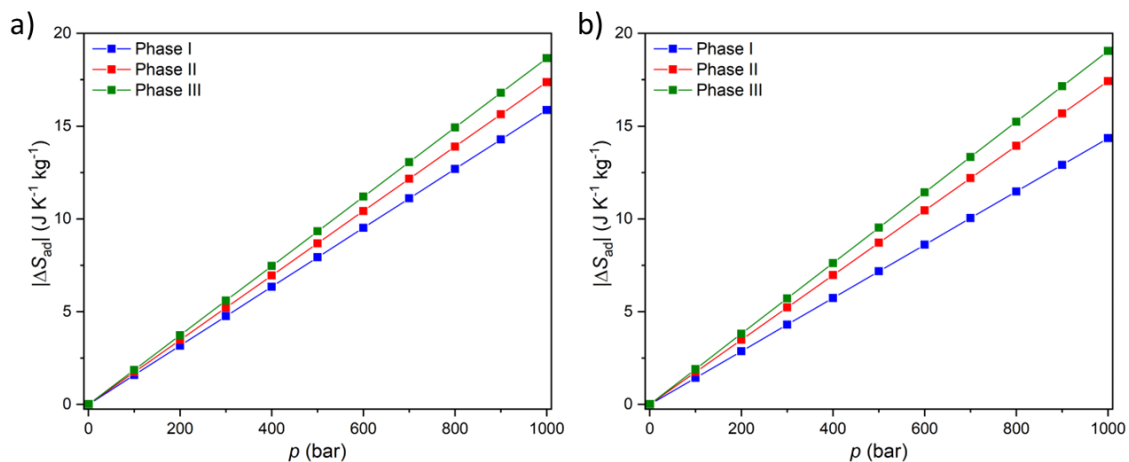

**Fig. S7.** Entropy caused by volumetric thermal expansion of the II→III transition for a) compound **1** and b) compound **2**.

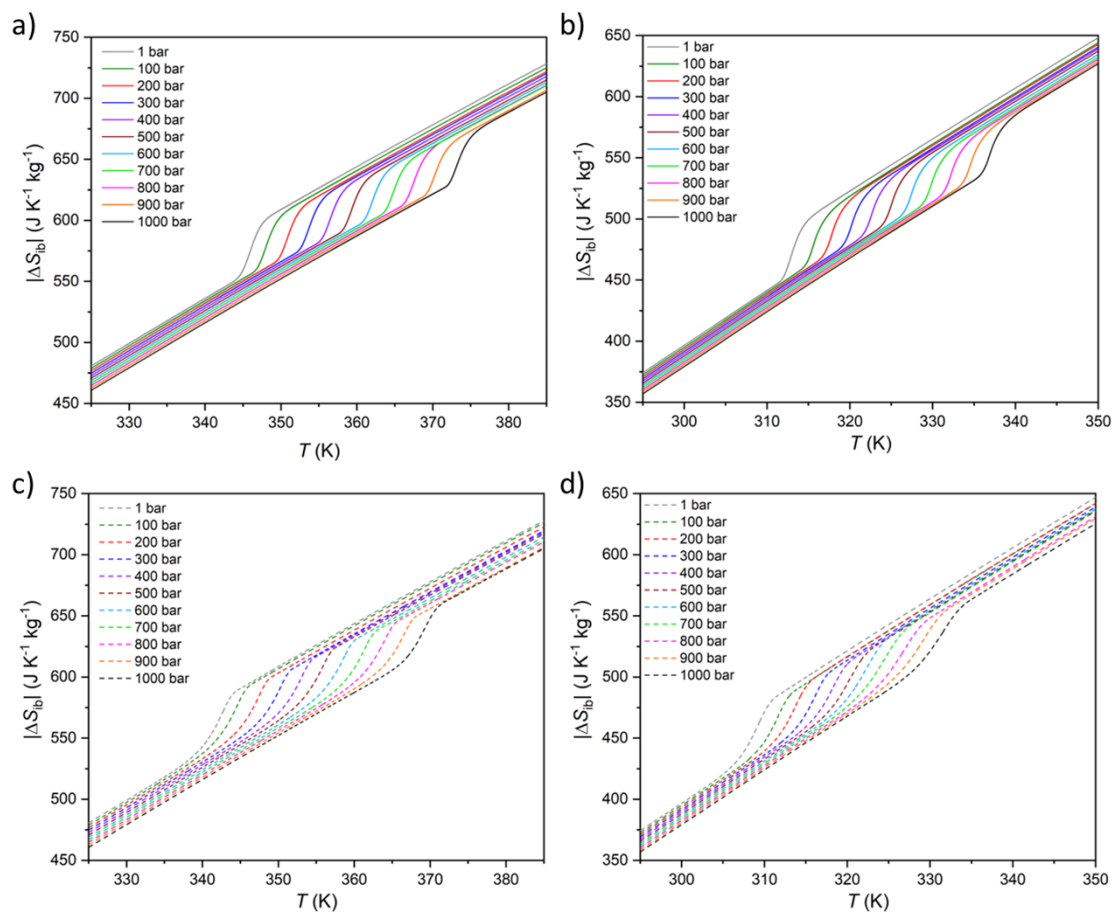

**Fig. S8.** Thermally driven isobaric changes in entropy of compound **1** a) on heating, b) on cooling and of compound **2** c) on heating and d) on cooling.

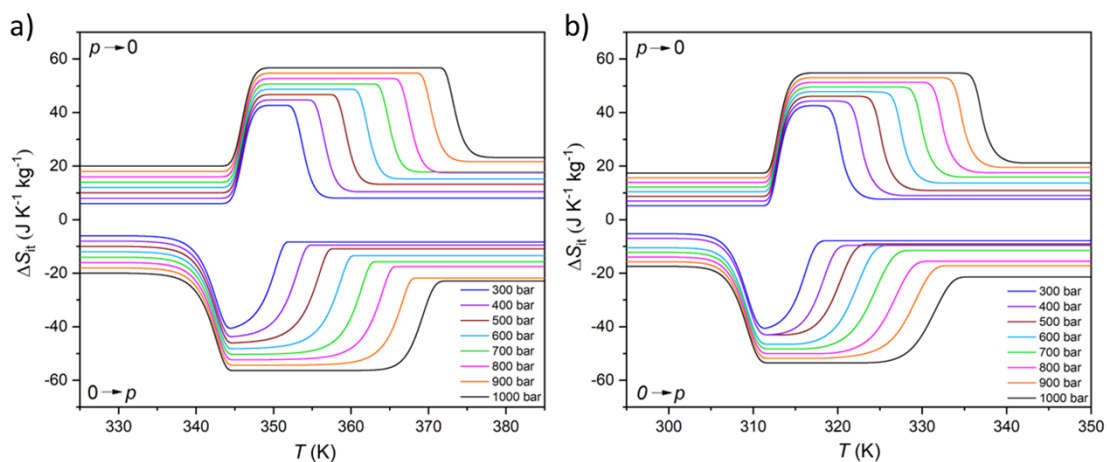

**Fig. S9.** Irreversible pressure-driven isothermal entropy changes on applying ( $0 \rightarrow p$ ) and removing ( $p \rightarrow 0$ ) pressure of a) compound **1** and b) compound **2**.

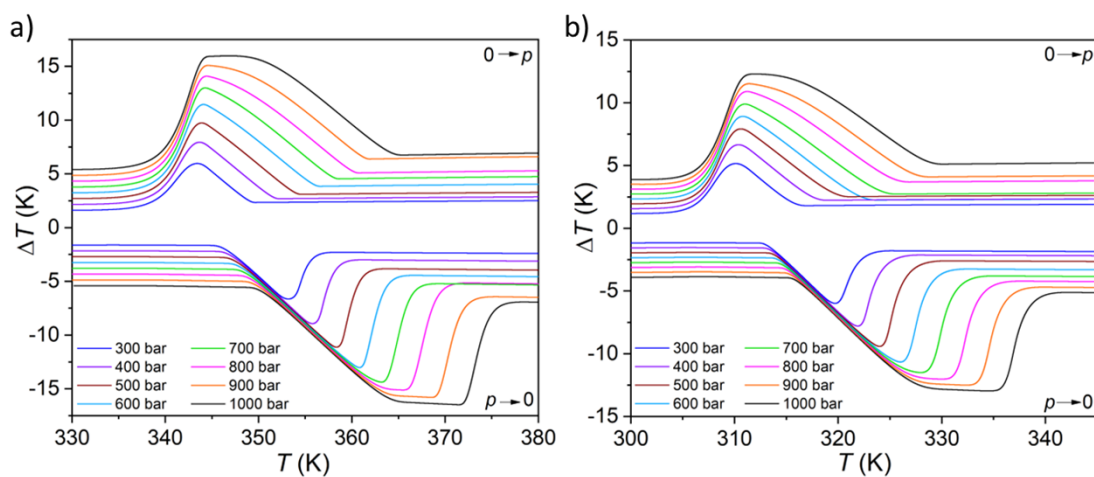

**Fig. S10.** Irreversible adiabatic temperature changes on applying ( $0 \rightarrow p$ ) and removing ( $p \rightarrow 0$ ) pressure for a) compound **1** and b) compound **2**.

**Table S1.** Barocaloric parameters of reported barocaloric materials, some represented in Figure 9.

| Number                                              | Material                                                                             | $T_i$ (K) | $p$ (bar) | $dT/dp$ (K kbar <sup>-1</sup> ) | $\Delta S_{rev}$ (J K <sup>-1</sup> kg <sup>-1</sup> ) | $\Delta T_{rev}$ (K) | Reference |
|-----------------------------------------------------|--------------------------------------------------------------------------------------|-----------|-----------|---------------------------------|--------------------------------------------------------|----------------------|-----------|
| <b>Organometallic-Sandwich Plastic Crystals</b>     |                                                                                      |           |           |                                 |                                                        |                      |           |
| 1                                                   | [Cp <sub>2</sub> Fe][PF <sub>6</sub> ]                                               | 347       | 1000      | 27.6                            | 56.7                                                   | 15.9                 | This work |
| 2                                                   | [Cp <sub>2</sub> Co][PF <sub>6</sub> ]                                               | 312       | 1000      | 24                              | 54.8                                                   | 12.0                 | This work |
| <b>Hybrid Organic-Inorganic Plastic Crystals</b>    |                                                                                      |           |           |                                 |                                                        |                      |           |
| 3                                                   | Quinuclidinium perrhenate                                                            | 344       | 1000      | 13.8                            | 26                                                     | 8                    | 1         |
| 4                                                   | [Me <sub>4</sub> N][FeCl <sub>4</sub> ]                                              | 384       | 900       | 40.0                            | 81                                                     | 21                   | 1         |
| 5                                                   | [(CH <sub>3</sub> ) <sub>3</sub> C(CH <sub>2</sub> )N][FeCl <sub>4</sub> ]           | 326       | 800       | 19.7                            | 123                                                    | -                    | 2         |
| 6                                                   | [(CH <sub>3</sub> ) <sub>3</sub> S][FeCl <sub>4</sub> ]                              | 315       | 1000      | 19.9                            | 125                                                    | -                    | 2         |
| 7                                                   | [DBA][BF <sub>4</sub> ]                                                              | 269       | 1000      | 28.9                            | 254                                                    | 17                   | 3         |
| <b>Organic Plastic Crystals</b>                     |                                                                                      |           |           |                                 |                                                        |                      |           |
| 8                                                   | C <sub>60</sub>                                                                      | 257       | 1000      | 17                              | 32                                                     | 9.7                  | 4         |
| 9                                                   | (CH <sub>3</sub> ) <sub>2</sub> C(CH <sub>2</sub> OH) <sub>2</sub>                   | 314       | 2500      | 11.3                            | 416                                                    | 8.2                  | 5         |
| 10                                                  | (CH <sub>3</sub> ) <sub>3</sub> C(CH <sub>2</sub> OH)                                | 354       | 2400      | 8.6                             | 498                                                    | 22.6                 | 6         |
| 11                                                  | (CH <sub>3</sub> )C(CH <sub>2</sub> OH) <sub>3</sub>                                 | 232       | 3300      | 17                              | 340                                                    | 9.9                  | 6         |
| 12                                                  | C <sub>10</sub> H <sub>15</sub> Cl                                                   | 254       | 1000      | 27.4                            | 153                                                    | 16.1                 | 7         |
| 13                                                  | C <sub>10</sub> H <sub>15</sub> Br                                                   | 316       | 1000      | 35.5                            | 134                                                    | 19.6                 | 7         |
| 14                                                  | 1-Adamantanol                                                                        | 361       | 1600      | 17.9                            | 175                                                    | 11                   | 8         |
| 15                                                  | 2-Adamantanol                                                                        | 326       | 1850      | 21                              | 100                                                    | 8                    | 8         |
| 16                                                  | 2-Methyl-2-adamantanol                                                               | 375       | 800       | 24.1                            | 300                                                    | 7                    | 8         |
| 17                                                  | <i>o</i> -carborane                                                                  | 277       | 600       | 30                              | 79                                                     | 14**                 | 9         |
| 18                                                  | <i>m</i> -carborane                                                                  | 286       | 600       | 34                              | 71                                                     | -                    | 9         |
| 19                                                  | <i>p</i> -carborane                                                                  | 308       | 600       | 31                              | 97                                                     | -                    | 9         |
| <b>Ammonium Salts</b>                               |                                                                                      |           |           |                                 |                                                        |                      |           |
| 20                                                  | (NH <sub>4</sub> ) <sub>2</sub> SnF <sub>6</sub>                                     | 110       | 1000      | -15.7                           | -61*                                                   | -11**                | 10        |
| 21                                                  | NH <sub>4</sub> HSO <sub>4</sub>                                                     | 160       | 1000      | -12.3                           | -60*                                                   | -10**                | 11        |
| 22                                                  | NH <sub>4</sub> I                                                                    | 268       | 800       | 81                              | 71                                                     | 34**                 | 12        |
| 23                                                  | FAI                                                                                  | 345       | 1000      | 9.7                             | 49.9                                                   | 24**                 | 13        |
| <b>Hybrid Organic-Inorganic Perovskites (HOIPs)</b> |                                                                                      |           |           |                                 |                                                        |                      |           |
| 24                                                  | [Pr <sub>4</sub> N][Mn(dca) <sub>3</sub> ]                                           | 330       | 70        | 23.1                            | 30.5                                                   | 4.1**                | 14        |
| 25                                                  | [Pr <sub>4</sub> N][Cd(dca) <sub>3</sub> ]                                           | 385       | 70        | 38.2                            | 11.5                                                   | -                    | 15        |
| 26                                                  | [(CH <sub>3</sub> ) <sub>4</sub> N][Mn(N <sub>3</sub> ) <sub>3</sub> ]               | 305       | 1100      | 12                              | 70                                                     | -                    | 16        |
| 27                                                  | [C <sub>10</sub> H <sub>21</sub> NH <sub>3</sub> ] <sub>2</sub> [MnCl <sub>4</sub> ] | 312       | 1000      | 25                              | 241                                                    | 12                   | 17        |
| 28                                                  | [C <sub>9</sub> H <sub>19</sub> NH <sub>3</sub> ] <sub>2</sub> [MnCl <sub>4</sub> ]  | 294       | 1000      | 17.2                            | 212                                                    | 10                   | 18        |
| 29                                                  | [C <sub>9</sub> H <sub>19</sub> NH <sub>3</sub> ] <sub>2</sub> [CuBr <sub>4</sub> ]  | 305       | 150       | 26.7                            | 75                                                     | 2.3                  | 19        |
| 30                                                  | [CH <sub>3</sub> NH <sub>3</sub> ][PbI <sub>3</sub> ]                                | 240       | 1000      | 6.4                             | 28.2                                                   | 4.4                  | 20        |
| <b>Polymers</b>                                     |                                                                                      |           |           |                                 |                                                        |                      |           |
| 31                                                  | Acetoxy Silicone Rubber                                                              | 250       | 1730      | 27                              | 182*                                                   | 21                   | 21        |
| 32                                                  | Vulcanized Natural Rubber                                                            | 303       | 1730      | 6.07                            | 17*                                                    | 10.5                 | 22        |
| <b>Spin-Crossover Materials (SCO)</b>               |                                                                                      |           |           |                                 |                                                        |                      |           |
| 33                                                  | [Fe(hyprtz) <sub>3</sub> ] <sub>2</sub> ·H <sub>2</sub> O                            | 273       | 900       | 33.2                            | 56*                                                    | 10                   | 23        |
| 34                                                  | Fe[HB(tz) <sub>3</sub> ] <sub>2</sub>                                                | 332       | 120       | 21.5                            | 89                                                     | 1.7                  | 24        |
| 35                                                  | [FeL <sub>2</sub> ][BF <sub>4</sub> ] <sub>2</sub>                                   | 257       | 430       | 15                              | 68*                                                    | 4                    | 25        |
| 36                                                  | Fe <sub>3</sub> (bntz) <sub>6</sub> (tcnset) <sub>6</sub>                            | 318       | 1200      | 25.6                            | 100                                                    | 22                   | 26        |
| 37                                                  | [Fe(pzt) <sub>6</sub> ](PF <sub>6</sub> ) <sub>2</sub>                               | 74        | 1000      | 29                              | 46*                                                    | 27                   | 27        |
| <b>Metal Alloys</b>                                 |                                                                                      |           |           |                                 |                                                        |                      |           |
| 38                                                  | MnNiSi <sub>10.59</sub> FeCoGe <sub>0.41</sub>                                       | 247       | 2300      | 7.5                             | 24                                                     | 1.8                  | 28        |
| 39                                                  | Ni <sub>50</sub> Mn <sub>31.5</sub> Ti <sub>18.5</sub>                               | 249       | 3800      | 0.26                            | 35*                                                    | 12***                | 29        |
| 40                                                  | LaFe <sub>11.33</sub> Co <sub>0.47</sub> Si <sub>1.2</sub>                           | 250       | 2000      | 9.4                             | 8.7*                                                   | -                    | 30        |
| 41                                                  | Gd <sub>2</sub> Si <sub>5</sub> Ge <sub>5</sub>                                      | 260       | 2000      | 3.5                             | 6.2*                                                   | -                    | 31        |
| 42                                                  | Mn <sub>3</sub> NiN                                                                  | 262       | 2800      | 1.4                             | 35*                                                    | 3.4***               | 32        |
| 43                                                  | Ni <sub>44.6</sub> Co <sub>5.5</sub> Mn <sub>35.5</sub> In <sub>14.4</sub>           | 272       | 6000      | 4.4                             | 15.6*                                                  | 6***                 | 33        |
| 44                                                  | Ni <sub>0.95</sub> Fe <sub>0.05</sub> S                                              | 274       | 1000      | 7.5                             | 39.6*                                                  | 8***                 | 34        |
| 45                                                  | Ni <sub>2.00</sub> Mn <sub>1.32</sub> Mo <sub>0.68</sub>                             | 275       | 2500      | 1.88                            | 4                                                      | 3***                 | 35        |
| 46                                                  | Co <sub>50</sub> Fe <sub>2.5</sub> V <sub>31.5</sub> Ga <sub>16</sub>                | 277       | 5000      | 2.5                             | 31                                                     | 6                    | 36        |
| 47                                                  | MnNiSi <sub>10.60</sub> FeCoGe <sub>0.40</sub>                                       | 280       | 2300      | 7.3                             | 47                                                     | 4                    | 28        |
| 48                                                  | MnCoGeB <sub>0.03</sub>                                                              | 286       | 2600      | 10                              | 30                                                     | 15***                | 37        |
| 49                                                  | Mn <sub>3</sub> GaN                                                                  | 290       | 930       | 6.5                             | 21.6*                                                  | 1.3**                | 38        |
| 50                                                  | Ni <sub>35.5</sub> Co <sub>14.5</sub> Mn <sub>35</sub> Ti <sub>15</sub>              | 291       | 1000      | 5                               | 8.5                                                    | 4.2***               | 39        |
| 51                                                  | Ni <sub>49.26</sub> Mn <sub>36.08</sub> In <sub>14.66</sub>                          | 293       | 2500      | 1.8                             | 10*                                                    | 9.4***               | 40        |
| 52                                                  | Ni <sub>0.875</sub> Fe <sub>0.125</sub> S                                            | 294       | 1000      | 7.5                             | 49.5*                                                  | -                    | 34        |
| 53                                                  | Ni <sub>0.85</sub> Fe <sub>0.15</sub> S                                              | 303       | 1000      | 7.5                             | 52.8*                                                  | -                    | 34        |
| 54                                                  | Ni <sub>1.99</sub> Mn <sub>1.34</sub> Mo <sub>0.67</sub>                             | 306       | 2000      | 1.37                            | 4                                                      | -                    | 35        |
| 55                                                  | MnCoGe <sub>0.99</sub> In <sub>0.01</sub>                                            | 310       | 3000      | 7.7                             | 52*                                                    | 2.1***               | 41        |
| 56                                                  | Fe <sub>49</sub> Rh <sub>51</sub>                                                    | 310       | 2500      | 6                               | 12                                                     | 5                    | 42        |
| 57                                                  | MnNiSi <sub>10.61</sub> FeCoGe <sub>0.39</sub>                                       | 311       | 2300      | 7                               | 44                                                     | 6                    | 28        |
| 58                                                  | Ni <sub>38.3</sub> Mn <sub>17.1</sub> Ga <sub>24.6</sub>                             | 318       | 10500     | 0.4                             | 13.6*                                                  | -                    | 43        |
| 59                                                  | Ni <sub>0.825</sub> Fe <sub>0.175</sub> S                                            | 318       | 1000      | 7.5                             | 46.8*                                                  | -                    | 34        |
| 60                                                  | Ni <sub>42.3</sub> Co <sub>7.9</sub> Mn <sub>38.8</sub> Sn <sub>11.0</sub>           | 327       | 6200      | 4.7                             | 15                                                     | 10***                | 44        |
| 61                                                  | Ni <sub>1.99</sub> Mn <sub>1.37</sub> Mo <sub>0.64</sub>                             | 329       | 2500      | 19.5                            | 6                                                      | 3.8***               | 35        |
| 62                                                  | Ni <sub>2.05</sub> Mn <sub>1.30</sub> Mo <sub>0.65</sub>                             | 330       | 2500      | 1.65                            | 5                                                      | 3.8***               | 35        |
| 63                                                  | MnNiSi <sub>10.62</sub> FeCoGe <sub>0.38</sub>                                       | 338       | 2700      | 7.5                             | 57*                                                    | -                    | 28        |
| 64                                                  | Ni <sub>2.02</sub> Mn <sub>1.36</sub> Mo <sub>0.62</sub>                             | 346       | 2500      | 1.83                            | 10                                                     | 4***                 | 35        |

Note: \* = Isobaric entropy change; \*\* = Adiabatic temperature change was calculated by indirect method ( $\Delta T_{rev} = \Delta S * T_i / C_p$ ); \*\*\* = Irreversible adiabatic temperature change

## References

- 1 A. Salvatori, D. Aguilà, G. Aromí, L. Mañosa, A. Planes, P. Lloveras, L. C. Pardo, M. Appel, G. F. Nataf, F. Giovannelli, M. Barrio, J. L. Tamarit and M. Romanini, *J. Mater. Chem. A*, 2023, **11**, 12140–12150.
- 2 J. Salgado-Beceiro, J. M. Bermúdez-García, E. Stern-Taulats, J. García-Ben, S. Castro-García, M. Sánchez-Andújar, X. Moya and M. A. Señaris-Rodríguez, *ChemRxiv*, 2021, 17–19.
- 3 J. García-Ben, J. M. Bermúdez-García, R. J. C. Dixey, I. Delgado-Ferreiro, A. L. Llamas-Saiz, J. López-Beceiro, R. Artiaga, A. García-Fernandez, U. B. Cappel, B. Alonso, S. Castro-García, A. E. Phillips, M. Sánchez-Andújar and M. A. Señaris-Rodríguez, *J. Mater. Chem. A*, 2023, **11**, 22232–22247.
- 4 J. Li, D. Dunstan, X. Lou, A. Planes, L. Mañosa, M. Barrio, J. L. Tamarit and P. Lloveras, *J. Mater. Chem. A*, 2020, **8**, 20354–20362.
- 5 P. Lloveras, A. Aznar, M. Barrio, P. Negrier, C. Popescu, A. Planes, L. Mañosa, E. Stern-Taulats, A. Avramenko, N. D. Mathur, X. Moya and J. L. Tamarit, *Nat. Commun.*, 2019, **10**, 1–7.
- 6 A. Aznar, P. Lloveras, M. M. Barrio, P. Negrier, A. Planes, L. L. Mañosa, N. D. Mathur, X. Moya and J. L. L. Tamarit, *J. Mater. Chem. A*, 2020, **8**, 639–647.
- 7 A. Aznar, P. Negrier, A. Planes, L. Mañosa, E. Stern-Taulats, X. Moya, M. Barrio, J. L. Tamarit and P. Lloveras, *Appl. Mater. Today*, 2021, **23**, 101023.
- 8 A. Salvatori, P. Negrier, A. Aznar, M. Barrio, J. L. Tamarit and P. Lloveras, *APL Mater.*, 2022, **10**, 111117.
- 9 K. Zhang, R. Song, J. Qi, Z. Zhang, Z. Zhang, C. Yu, K. Li, Z. Zhang and B. Li, *Adv. Funct. Mater.*, 2022, **32**, 2112622.
- 10 I. N. Flerov, A. V. Kartashev, M. V. Gorev, E. V. Bogdanov, S. V. Mel'Nikova, M. S. Molokeev, E. I. Pogoreltsev and N. M. Laptash, *J. Fluor. Chem.*, 2016, **183**, 1–9.
- 11 M. V. Gorev, E. A. Mikhaleva, I. N. Flerov and E. V. Bogdanov, *J. Alloys Compd.*, 2019, **806**, 1047–1051.
- 12 Q. Ren, J. Qi, D. Yu, Z. Zhang, R. Song, W. Song, B. Yuan, T. Wang, W. Ren, Z. Zhang, X. Tong and B. Li, *Nat. Commun.*, 2022, **13**, 1–9.
- 13 C. Yu, J. Huang, J. Qi, P. Liu, D. Li, T. Yang, Z. Zhang and B. Li, *APL Mater.*, 2022, **10**, 011109.
- 14 J. M. Bermúdez-García, M. Sánchez-Andújar, S. Castro-García, J. López-Beceiro, R. Artiaga and M. A. Señaris-Rodríguez, *Nat. Commun.*, 2017, **8**, 15715.
- 15 J. M. Bermúdez-García, S. Yáñez-Vilar, A. García-Fernández, M. Sánchez-Andújar, S. Castro-García, J. López-Beceiro, R. Artiaga, M. Dilshad, X. Moya and M. A. Señaris-Rodríguez, *J. Mater. Chem. C*, 2018, **6**, 9867–9874.
- 16 J. Salgado-Beceiro, A. Nonato, R. X. Silva, A. García-Fernández, M. Sánchez-Andújar, S. Castro-García, E. Stern-Taulats, M. A. Señaris-Rodríguez, X. Moya and J. M. Bermúdez-García, *Mater. Adv.*, 2020, **1**, 3167–3170.
- 17 J. Li, M. Barrio, D. J. Dunstan, R. Dixey, X. Lou, J. L. Tamarit, A. E. Phillips and P. Lloveras, *Adv. Funct. Mater.*, 2021, **31**, 1–8.
- 18 Y. Gao, H. Liu, F. Hu, H. Song, H. Zhang, J. Hao, X. Liu, Z. Yu, F. Shen, Y. Wang, H. Zhou, B. Wang, Z. Tian, Y. Lin, C. Zhang, Z. Yin, J. Wang, Y. Chen, Y. Li, Y. Song, Y. Shi, T. Zhao, J. Sun, Q. Huang and B. Shen, *NPG Asia Mater.*, 2022, **14**, 34.
- 19 J. Seo, R. D. McGillicuddy, A. H. Slavney, S. Zhang, R. Ukani, A. A. Yakovenko, S. L. Zheng and J. A. Mason, *Nat. Commun.*, 2022, **13**, 1–15.
- 20 C. Escorihuela-Sayalero, L. C. Pardo, M. Romanini, N. Obrecht, S. Loehlé, P. Lloveras, J. –L Tamarit and C. Cazorla, *npj Comput. Mater.*, 2024, **10**, 13.
- 21 W. Imamura, É. O. Usuda, L. S. Paixão, N. M. Bom, A. M. Gomes and A. M. G. Carvalho, *Chinese J. Polym. Sci.*, 2020, **38**, 999–1005.
- 22 E. O. Usuda, N. M. Bom and A. M. G. Carvalho, *Eur. Polym. J.*, 2017, **92**, 287–293.
- 23 P. J. Von Ranke, B. P. Alho, R. M. Ribas, E. P. Nobrega, A. Caldas, V. S. R. De Sousa, M. V. Colaço, L. F. Marques, D. L. Rocco and P. O. Ribeiro, *Phys. Rev. B*, 2018, **98**, 2–6.
- 24 J. Seo, J. D. Braun, V. M. Dev and J. A. Mason, *J. Am. Chem. Soc.*, 2022, **144**, 6493–6503.
- 25 S. P. Vallone, A. N. Tantillo, A. M. dos Santos, J. J. Molaison, R. Kulmaczewski, A. Chapoy, P. Ahmadi,



- M. A. Halcrow and K. G. Sandeman, *Adv. Mater.*, 2019, **31**, 1–7.
- 26 M. Romanini, Y. Wang, G. Kübra, G. Ornelas, P. Lloveras, Y. Zhang, W. Zheng, M. Barrio, A. Aznar, A. Gràcia-Condal, B. Emre, O. Atakol, C. Popescu, H. Zhang, Y. Long, L. Balicas, J. L. Tamarit, A. Planes, M. Shatruk and L. Mañosa, *Adv. Mater.*, 2021, **33**, 2008076.
- 27 P. J. von Ranke, B. P. Alho and P. O. Ribeiro, *J. Alloys Compd.*, 2018, **749**, 556–560.
- 28 P. Lloveras, T. Samanta, M. Barrio, I. Dubenko, N. Ali, J. L. Tamarit and S. Stadler, *APL Mater.*, 2019, **7**, 0–9.
- 29 A. Aznar, A. Gràcia-Condal, A. Planes, P. Lloveras, M. Barrio, J. L. Tamarit, W. Xiong, D. Cong, C. Popescu and L. Mañosa, *Phys. Rev. Mater.*, 2019, **3**, 1–7.
- 30 L. Mañosa, D. González-Alonso, A. Planes, M. Barrio, J. L. Tamarit, I. S. Titov, M. Acet, A. Bhattacharyya and S. Majumdar, *Nat. Commun.*, 2011, **2**, 1–5.
- 31 S. Yuçe, M. Barrio, B. Emre, E. Stern-Taulats, A. Planes, J. L. Tamarit, Y. Mudryk, K. A. Gschneidner, V. K. Pecharsky and L. Mañosa, *Appl. Phys. Lett.*, 2012, **101**, 071906.
- 32 D. Boldrin, E. Mendive-Tapia, J. Zemen, J. B. Staunton, T. Hansen, A. Aznar, J. L. Tamarit, M. Barrio, P. Lloveras, J. Kim, X. Moya and L. F. Cohen, *Phys. Rev. X*, 2018, **8**, 41035.
- 33 X. He, S. Wei, Y. Kang, Y. Zhang, Y. Cao, K. Xu, Z. Li and C. Jing, *Scr. Mater.*, 2018, **145**, 58–61.
- 34 J. Lin, P. Tong, X. Zhang, Z. Wang, Z. Zhang, B. Li, G. Zhong, J. Chen, Y. Wu, H. Lu, L. He, B. Bai, L. Ling, W. Song, Z. Zhang and Y. Sun, *Mater. Horizons*, 2020, **7**, 2690–2695.
- 35 E. Stern-Taulats, A. Planes, P. Lloveras, M. Barrio, J. L. Tamarit, S. Pramanick, S. Majumdar, S. Yuçe, B. Emre, C. Frontera and L. Mañosa, *Acta Mater.*, 2015, **96**, 324–332.
- 36 H. Liu, Z. Li, Y. Zhang, Z. Ni, K. Xu and Y. Liu, *Scr. Mater.*, 2020, **177**, 1–5.
- 37 A. Aznar, P. Lloveras, J. Y. Kim, E. Stern-Taulats, M. Barrio, J. L. Tamarit, C. F. Sánchez-Valdés, J. L. Sánchez Llamazares, N. D. Mathur and X. Moya, *Adv. Mater.*, 2019, **31**, 1–6.
- 38 D. Matsunami, A. Fujita, K. Takenaka and M. Kano, *Nat. Mater.*, 2015, **14**, 73–78.
- 39 Z. Wei, Y. Shen, Z. Zhang, J. Guo, B. Li, E. Liu, Z. Zhang and J. Liu, *APL Mater.*, 2020, **8**, 051101.
- 40 L. Mañosa, D. González-Alonso, A. Planes, E. Bonnot, M. Barrio, J. L. Tamarit, S. Aksoy and M. Acet, *Nat. Mater.*, 2010, **9**, 478–481.
- 41 R. R. Wu, L. F. Bao, F. X. Hu, H. Wu, Q. Z. Huang, J. Wang, X. L. Dong, G. N. Li, J. R. Sun, F. R. Shen, T. Y. Zhao, X. Q. Zheng, L. C. Wang, Y. Liu, W. L. Zuo, Y. Y. Zhao, M. Zhang, X. C. Wang, C. Q. Jin, G. H. Rao, X. F. Han and B. G. Shen, *Sci. Rep.*, 2015, **5**, 1–11.
- 42 E. Stern-Taulats, A. Planes, P. Lloveras, M. Barrio, J. L. Tamarit, S. Pramanick, S. Majumdar, C. Frontera and L. Mañosa, *Phys. Rev. B - Condens. Matter Mater. Phys.*, 2014, **89**, 1–8.
- 43 X. J. He, K. Xu, S. X. Wei, Y. L. Zhang, Z. Li and C. Jing, *J. Mater. Sci.*, 2017, **52**, 2915–2923.
- 44 X. He, Y. Kang, S. Wei, Y. Zhang, Y. Cao, K. Xu, Z. Li, C. Jing and Z. Li, *J. Alloys Compd.*, 2018, **741**, 821–825.
